# Supplementary material for: Impact of Rootstock and Season on Red Blotch Disease Expression in Cabernet Sauvignon (V. vinifera)
Source: MDPI journal article supplement (doi:10.3390/plants10081583), 2021-07-31
Supplement: s1 [file s1]

**Table S1.** Phenolic content (mg/berry) and concentrations (mg/ g berry) of grape extracts at harvest determined through protein precipitation assay across rootstocks and seasons. The main effects, two-way, and three-way interactions ANOVA were determined for content and concentration for each class of compounds.

| mg/berry            |                 |                    |               | mg/g berry          |                 |                    |               |
|---------------------|-----------------|--------------------|---------------|---------------------|-----------------|--------------------|---------------|
| 2016                | Total Phenolics | Total Anthocyanins | Total Tannins | 2016                | Total Phenolics | Total Anthocyanins | Total Tannins |
| CS 110R RB (-)      | 7.54 ± 0.41     | 1.57 ± 0.43        | 3.04 ± 0.21   | CS 110R RB (-)      | 6.54 ± 0.17     | 1.28 ± 0.40        | 2.64 ± 0.15   |
| CS 110R RB (+)      | 8.60 ± 0.27     | 1.54 ± 0.16        | 3.31 ± 0.13   | CS 110R RB (+)      | 7.55 ± 0.20     | 1.31 ± 0.17        | 2.90 ± 0.069  |
| CS 420A RB (-)      | 9.49 ± 0.68     | 0.76 ± 0.079       | 3.82 ± 0.19   | CS 420A RB (-)      | 7.42 ± 0.52     | 0.66 ± 0.024       | 2.99 ± 0.15   |
| CS 420A RB (+)      | 10.25 ± 0.77    | 0.68 ± 0.12        | 3.47 ± 0.33   | CS 420A RB (+)      | 6.94 ± 0.77     | 0.60 ± 0.07        | 2.35 ± 0.32   |
| 2017                | Total Phenolics | Total Anthocyanins | Total Tannins | 2017                | Total Phenolics | Total Anthocyanins | Total Tannins |
| CS 110R RB (-)      | 8.22 ± 0.96     | 1.30 ± 0.18        | 6.24 ± 0.79   | CS 110R RB (-)      | 8.73 ± 0.61     | 1.37 ± 0.14        | 6.62 ± 0.47   |
| CS 110R RB (+)      | 9.72 ± 1.46     | 0.84 ± 0.14        | 7.23 ± 1.04   | CS 110R RB (+)      | 11.72 ± 0.83    | 0.85 ± 0.10        | 8.73 ± 0.65   |
| CS 420A RB (-)      | 11.22 ± 1.09    | 2.63 ± 0.35        | 9.01 ± 0.84   | CS 420A RB (-)      | 10.85 ± 0.68    | 2.81 ± 0.31        | 8.71 ± 0.42   |
| CS 420A RB (+)      | 9.78 ± 0.43     | 2.33 ± 0.20        | 7.77 ± 0.37   | CS 420A RB (+)      | 9.65 ± 0.43     | 2.44 ± 0.20        | 7.66 ± 0.31   |
| Significant Effects |                 |                    |               | Significant Effects |                 |                    |               |
| V                   |                 | **                 |               | V                   | ***             | **                 | *             |
| Y                   | **              | ***                | ***           | Y                   | ***             | ***                | ***           |
| R                   | ***             | ***                | ***           | R                   | *               | ***                | **            |
| V x Y               |                 | *                  |               | V x Y               |                 | **                 | *             |
| V x R               | **              |                    | ***           | V x R               | ***             |                    | ***           |
| Y x R               |                 | ***                | **            | Y x R               | *               | ***                |               |
| V x Y x R           | *               |                    | *             | V x Y x R           | ***             |                    | ***           |

CS = Cabernet Sauvignon, RB = red blotch, (-) = negative, (+) = positive, V = virus status, Y = year, and R = rootstock. Asterisks indicate a significant difference between RB (-) and RB (+) after an ANOVA (\* =  $p < 0.05$ , \*\* =  $p < 0.01$ , \*\*\* =  $p < 0.001$ ).

**Table S2.** HS-SPME-GC-MS analysis of volatile compound content (mg/berry) in grapes at harvest (n = 5).

| Compound (mg/berry)               | 2017           |                |                |                | 2016           |                |                |                |
|-----------------------------------|----------------|----------------|----------------|----------------|----------------|----------------|----------------|----------------|
|                                   | CS 110R RB (-) | CS 110R RB (+) | CS 420A RB (-) | CS 420A RB (+) | CS 110R RB (-) | CS 110R RB (+) | CS 420A RB (-) | CS 420A RB (+) |
| Ethyl Acetate † <sup>‡</sup>      | 0.92 ± 0.45    | 3.88 ± 1.22    | 0.07 ± 0.03    | 0.07 ± 0.05    | 2.27 ± 0.49    | 0.59 ± 0.17    | 1.32 ± 0.37    | 1.00 ± 0.29    |
| Hexanal                           | 4.73 ± 1.12    | 1.55 ± 0.99    | 3.94 ± 2.35    | 4.84 ± 2.91    | 0.10 ± 0.02    | 0.15 ± 0.04    | 0.11 ± 0.02    | 0.17 ± 0.04    |
| β-Myrcene                         | 0.03 ± 0.02    | 0.01 ± 0.00    | 0.03 ± 0.01    | 0.03 ± 0.02    | 0.49 ± 0.11    | 0.35 ± 0.08    | 0.40 ± 0.09    | 0.30 ± 0.09    |
| Limonene # <sup>‡</sup>           | 0.12 ± 0.05    | 0.07 ± 0.03    | 0.12 ± 0.02    | 0.14 ± 0.05    | 0.29 ± 0.03    | 0.20 ± 0.03    | 0.22 ± 0.04    | 0.20 ± 0.04    |
| 2-Hexenal † <sup>‡</sup>          | 1.61 ± 0.61    | 0.82 ± 0.39    | 1.98 ± 0.74    | 3.04 ± 1.79    | 7.14 ± 1.50    | 13.33 ± 3.09   | 10.78 ± 1.37   | 15.97 ± 2.09   |
| Ethyl Hexanoate † <sup>‡</sup>    | 0.18 ± 0.09    | 0.21 ± 0.12    | 0.06 ± 0.02    | 0.04 ± 0.04    | 0.49 ± 0.07    | 0.26 ± 0.08    | 0.32 ± 0.08    | 0.30 ± 0.11    |
| p-Cymene # <sup>‡</sup>           | 0.01 ± 0.00    | 0.01 ± 0.00    | 0.01 ± 0.00    | 0.01 ± 0.00    | 0.04 ± 0.00    | 0.02 ± 0.00    | 0.02 ± 0.00    | 0.02 ± 0.00    |
| Hexyl acetate † <sup>‡</sup>      | 0.04 ± 0.03    | 0.07 ± 0.03    | 0.03 ± 0.00    | 0.03 ± 0.01    | 0.61 ± 0.08    | 0.38 ± 0.07    | 0.46 ± 0.07    | 0.40 ± 0.06    |
| Octanal <sup>‡</sup>              | 0.02 ± 0.01    | 0.01 ± 0.01    | 0.02 ± 0.00    | 0.03 ± 0.01    | 0.13 ± 0.02    | 0.13 ± 0.03    | 0.18 ± 0.04    | 0.18 ± 0.05    |
| Hexanol †                         | 1.72 ± 0.43    | 1.62 ± 0.60    | 1.52 ± 0.29    | 1.91 ± 1.23    | 10.36 ± 2.31   | 9.22 ± 3.40    | 8.19 ± 1.30    | 9.66 ± 1.88    |
| trans-3-Hexen-1-ol †              | 0.11 ± 0.04    | 0.09 ± 0.03    | 0.11 ± 0.02    | 0.14 ± 0.09    | 1.09 ± 0.25    | 0.73 ± 0.20    | 0.78 ± 0.18    | 0.78 ± 0.15    |
| cis-3-Hexen-1-ol † <sup>‡</sup>   | 0.28 ± 0.09    | 0.39 ± 0.14    | 0.25 ± 0.06    | 0.59 ± 0.30    | 1.18 ± 0.35    | 2.97 ± 1.19    | 1.33 ± 0.19    | 2.86 ± 0.54    |
| trans-2-Hexen-1-ol † <sup>‡</sup> | 6.11 ± 2.24    | 5.98 ± 2.20    | 6.02 ± 1.02    | 7.98 ± 4.96    | 7.03 ± 1.58    | 6.03 ± 2.42    | 5.38 ± 0.86    | 7.63 ± 1.27    |
| Ethyl Octanoate                   | 0.02 ± 0.02    | 0.01 ± 0.01    | 0.95 ± 0.05    | 1.36 ± 0.58    | 0.05 ± 0.01    | 0.03 ± 0.01    | 1.98 ± 0.35    | 2.42 ± 0.33    |
| Nerol oxide #                     | 0.02 ± 0.03    | 0.01 ± 0.01    | 0.09 ± 0.03    | 0.12 ± 0.07    | 0.17 ± 0.02    | 0.14 ± 0.02    | 0.43 ± 0.10    | 0.37 ± 0.16    |
| Benzaldehyde #                    | 0.09 ± 0.03    | 0.06 ± 0.02    | 0.003 ± 0.00   | 0.01 ± 0.00    | 0.61 ± 0.14    | 0.40 ± 0.10    | 0.14 ± 0.02    | 0.15 ± 0.02    |
| β-linalool                        | 0.01 ± 0.00    | 0.01 ± 0.00    | 0.05 ± 0.01    | 0.06 ± 0.03    | 0.08 ± 0.02    | 0.05 ± 0.01    | 0.42 ± 0.07    | 0.46 ± 0.10    |
| Geraniol † <sup>‡</sup>           | 0.02 ± 0.00    | 0.02 ± 0.01    | 0.03 ± 0.01    | 0.04 ± 0.01    | 0.07 ± 0.01    | 0.04 ± 0.00    | 3.02 ± 0.13    | 3.02 ± 0.29    |
| β-Damascenone †                   | 0.01 ± 0.00    | 0.02 ± 0.01    | 0.01 ± 0.00    | 0.01 ± 0.00    | 0.03 ± 0.01    | 0.02 ± 0.01    | 0.05 ± 0.01    | 0.04 ± 0.01    |
| Benzyl alcohol #                  | 0.19 ± 0.049   | 0.12 ± 0.05    | 0.004 ± 0.00   | 0.01 ± 0.00    | 0.79 ± 0.15    | 0.52 ± 0.14    | 0.02 ± 0.01    | 0.03 ± 0.01    |
| 2-Phenethyl alcohol               | 0.22 ± 0.05    | 0.15 ± 0.07    | 0.14 ± 0.05    | 0.15 ± 0.06    | 1.14 ± 0.22    | 0.74 ± 0.15    | 0.29 ± 0.07    | 0.22 ± 0.07    |
| β-Ionone <sup>‡</sup>             | 0.01 ± 0.00    | 0.01 ± 0.01    | 0.11 ± 0.03    | 0.11 ± 0.06    | 0.03 ± 0.00    | 0.01 ± 0.00    | 0.45 ± 0.09    | 0.46 ± 0.10    |
| Ethyl cinnamate †                 | 0.01 ± 0.01    | 0.02 ± 0.00    | 0.01 ± 0.00    | 0.01 ± 0.00    | 0.07 ± 0.04    | 0.03 ± 0.01    | 0.02 ± 0.00    | 0.02 ± 0.00    |

CS = Cabernet Sauvignon, RB = red blotch, (-) = negative, (+) = positive, † = volatile compound has significant virus status to year effect, # = volatile compound has significant virus status to rootstock effect, <sup>‡</sup> = volatile compound has significant virus status effect.

**Table S3.** °Brix, pH, TA (g/L), YAN (mg/L), malic acid (mg/L) measurements from CS110R and CS420A symptomatic and asymptomatic vines used for winemaking in 2016 and 2017 (n=3).

| Sample         | Harvest Date | °Brix        | pH          | TA (g/L)    | Malic Acid (mg/L) |
|----------------|--------------|--------------|-------------|-------------|-------------------|
| CS 110R RB (-) | 9/20/16      | 25.6 ± 0.1 a | 3.6 ± 0.0 a | 3.8 ± 0.3 b | 1460.0 ± 55. b    |
| CS 110R RB (+) | 9/20/16      | 21.7 ± 0.1 b | 3.5 ± 0.0 a | 4.8 ± 0.1 a | 2275.0 ± 48.6 a   |
| CS 420A RB (-) | 9/20/16      | 24.3 ± 0.1 a | 3.5 ± 0.0 a | 4.2 ± 0.1 b | 1625.7 ± 48.0 b   |
| CS 420A RB (+) | 9/20/16      | 22.1 ± 0.1 b | 3.5 ± 0.0 a | 4.5 ± 0.1 a | 1852.0 ± 13.9 a   |
| CS 110R RB (-) | 9/26/17      | 25.5 ± 0.1 a | 3.6 ± 0.0 a | 4.0 ± 0.0 b | 2649.3 ± 45.7 a   |
| CS 110R RB (+) | 9/26/17      | 23.4 ± 0.0 b | 3.6 ± 0.0 a | 4.9 ± 0.1 a | 2779.0 ± 68.6 a   |
| CS 420A RB (-) | 10/6/17      | 25.3 ± 0.1 a | 3.6 ± 0.0 a | 4.6 ± 0.1 a | 2201.0 ± 34.7 b   |
| CS 420A RB (+) | 10/6/17      | 23.6 ± 0.3 b | 3.5 ± 0.0 a | 4.8 ± 0.0 a | 2870.0 ± 21.0 a   |

TA = Titratable Acidity, CS110 = CS 110R, CS420 = CS 420A, RB = red blotch, (-) = negative, and (+) = positive. Difference in lettering indicates a significant difference between RB (-) and RB (+) after applying Tuckey's HSD test ( $p < 0.05$ ).
